# Supplementary figures and images for: Role of Neurocellular Endoplasmic Reticulum Stress Response in Alzheimer’s Disease and Related Dementias Risk
Source: MDPI journal article supplement (doi:10.3390/genes15050569), 2024-04-28

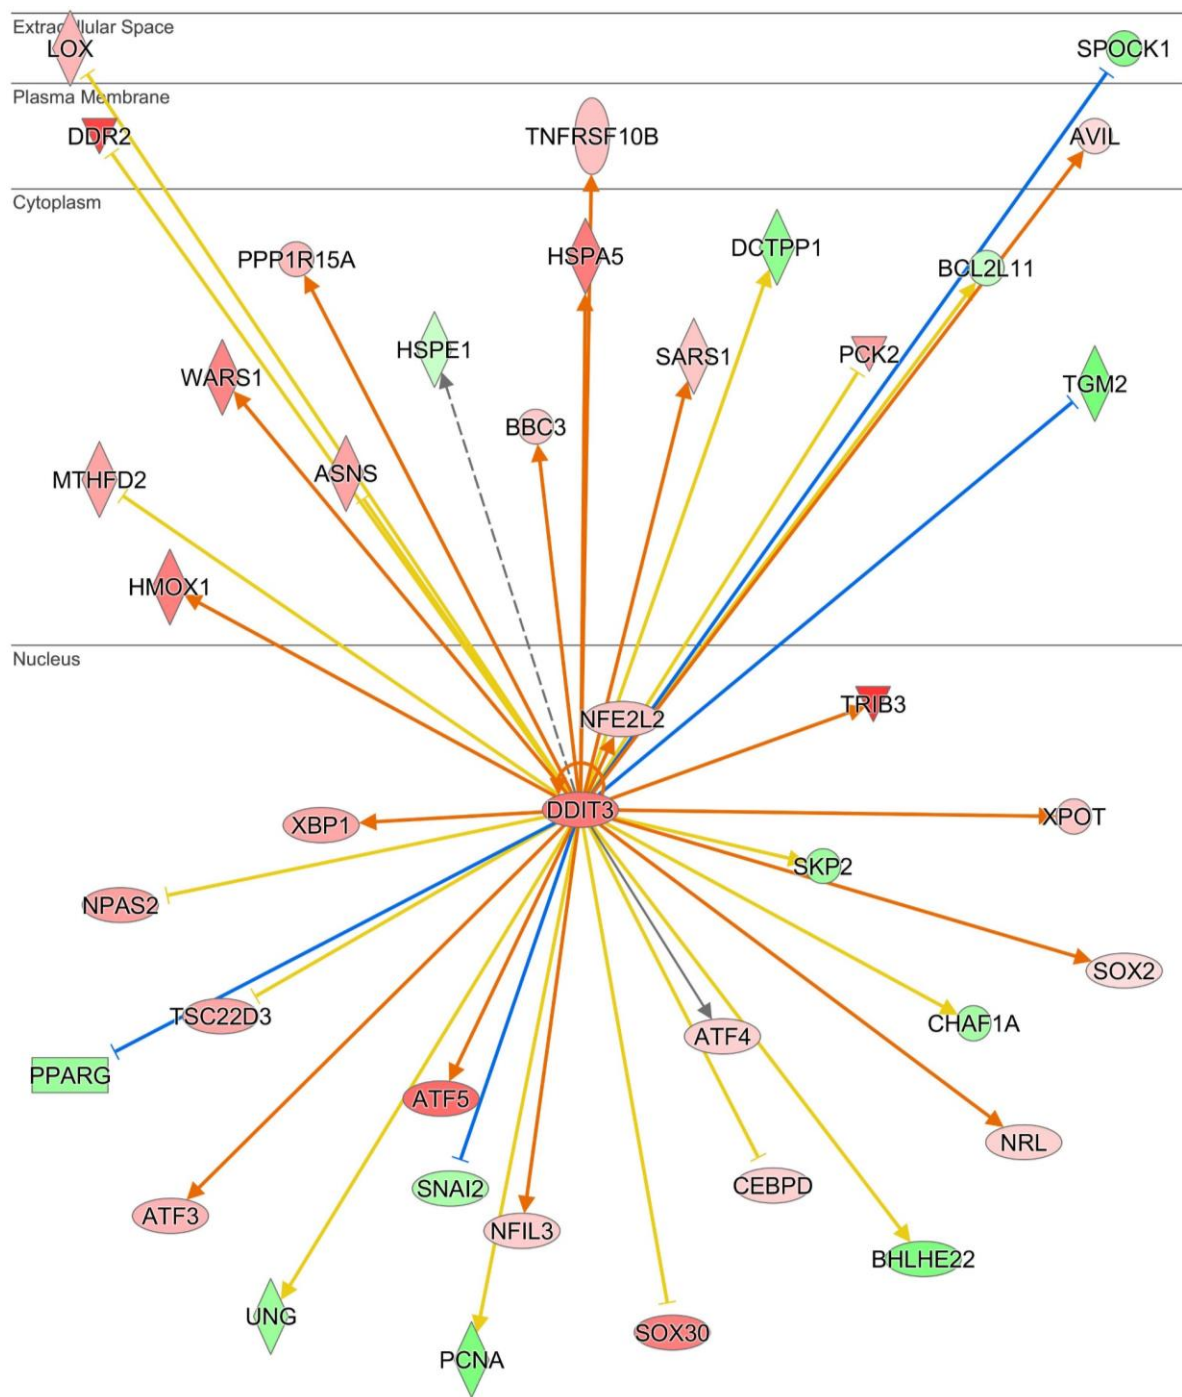

**Figure S1. *DDIT3* (*CHOP*) gene network showing its direct downstream DE targets.**

Supplement: s1 [file s1]
